# Supplementary material
Source: PubMed Central journal article supplement (PMC2492653)
Supplement: pp.108.116632_1.pdf [file pp.108.116632_1.pdf]

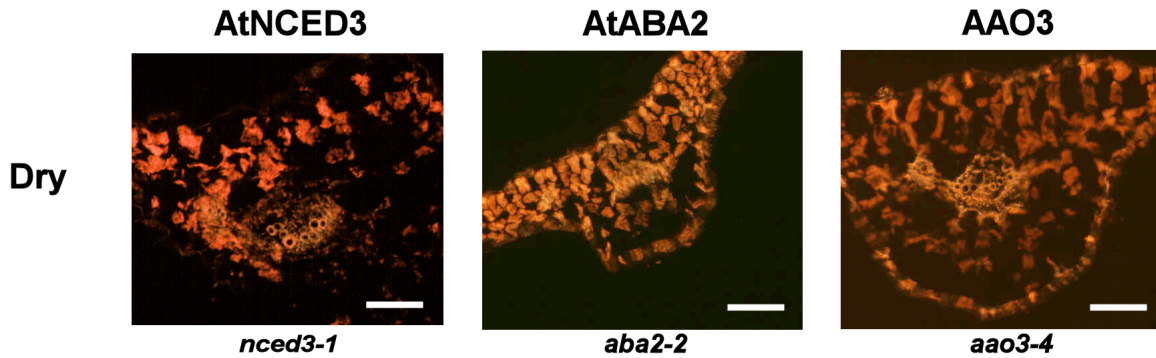

**Figure S1. Negative controls of immunohistochemical analysis on cross sections from dehydrated rosette leaves of the corresponding mutants.** Transverse sections of the main vein of rosette leaves were prepared from 6 hour-dehydrated mutants (AtNCED3; *nced3-1*, AtABA2; *aba2-2*, AAO3; *aao3-4*). Each section was immuno-stained with corresponding antibodies (anti-AtNCED3 antibody for *T5004*, anti-AtABA2 antibody for *aba2-2*, anti-AAO3 antibody for *aao3-4*). Red fluorescence is autofluorescence from chloroplasts or xylem vessels. Scale bars indicate 100  $\mu\text{m}$ .
